# Supplementary material for: Two birds with one stone: cobalt/silicon species encapsulated in MOF-derived nitrogen-doped carbon as an integrated electrode for next-generation symmetric pseudocapacitors with energy density over 100 W h kg−1
Source: Royal Society of Chemistry journal article supplement (doi:10.1039/d3ta01114c), 2023-01-01
Supplement: d3ta01114c1.pdf [file d3ta01114c1.pdf]

## Supplementary Information

### **Two Birds with One Stone: Cobalt/Silicon Species Encapsulated in MOF-derived Nitrogen-doped Carbon as an Integrated Electrode for Next-Generation Symmetric Pseudocapacitor with Energy Density over 100 Wh/kg**

*Abdul Mateen<sup>a,1</sup>, Muhammad Sufyan Javed<sup>b,\*1</sup>, Xiaofeng Zhang<sup>b,1</sup>, Iftikhar Hussain<sup>c</sup>, Tayyaba Najam<sup>d</sup>, Awais Ahmad<sup>e</sup>, Asma A. Alothman<sup>f</sup>, Mohamed Ouladsmame<sup>f</sup>, Sayed M. Eldin<sup>g</sup>, Weihua Han<sup>b,\*</sup>, Kui-Qing Peng<sup>a,\*</sup>*

<sup>a</sup>Department of Physics and Beijing Key Laboratory of Energy Conversion and Storage Materials, Beijing Normal University, Beijing, 100084, China

Email: [kq\\_peng@bnu.edu.cn](mailto:kq_peng@bnu.edu.cn)

<sup>b</sup>School of Physical Science and Technology, Lanzhou University, Lanzhou 730000, China

Email: [safisabri@gmail.com](mailto:safisabri@gmail.com), [hanwh@lzu.edu.cn](mailto:hanwh@lzu.edu.cn)

<sup>c</sup>Department of Mechanical Engineering, City University of Hong Kong, 83 Tat Chee Avenue, Kowloon, Hong Kong

<sup>d</sup>College of Chemistry and Environmental Engineering, Shenzhen University, Shenzhen 518060, China

<sup>e</sup>Departamento de Química Orgánica, Universidad de Córdoba, Edificio Marie Curie (C-3), 8 Ctra Nnal IV-A, Km 396, E14014 Córdoba, Spain

<sup>f</sup>Department of Chemistry, College of Science, King Saud University, Riyadh 11451, Saudi Arabia

<sup>g</sup>Faculty of Engineering and Technology, Future University in Egypt, New Cairo 11835, Egypt

<sup>1</sup>Equally contributed

Supporting Figures:

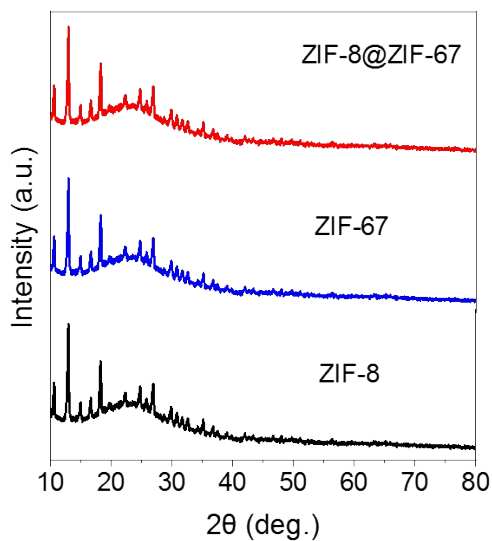

Figure S1: XRD patterns of core-shell ZIF-67@ZIF-8, ZIF-67 and ZIF-8

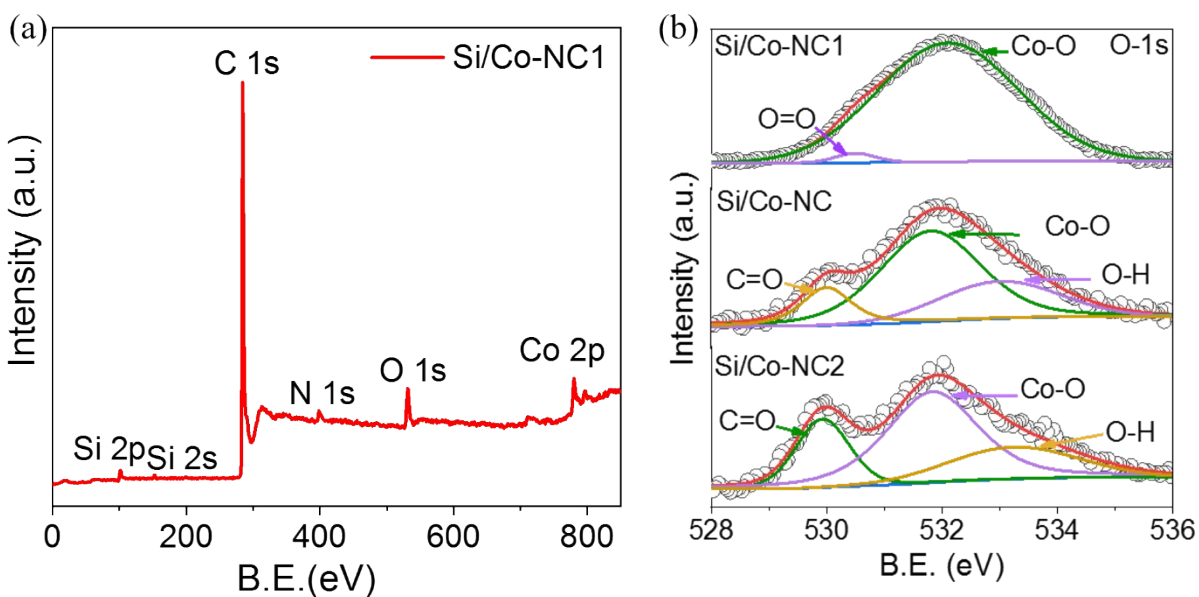

Figure S2: (a) Full XPS survey spectrum of Si/Co-NC1; (b) Deconvoluted XPS spectrums of O1s

**Table S1:** Average pore size of all the samples Si/CO-NC, Si/CO-NC1, Si/CO-NC2, Si-NC, and Co-NC.

| <b>Sample</b> | <b>Average pore size (nm)</b> |
|---------------|-------------------------------|
| Si/CO-NC      | 13.8                          |
| Si/CO-NC1     | 10.1                          |
| Si/CO-NC2     | 13.4                          |
| Si-NC         | 17.2                          |
| Co-NC         | 26.5                          |

**Table S2:** A comparison of charge transfer resistance ( $R_{ct}$  ( $\Omega$ )) and equivalent series resistance ( $R_s$  ( $\Omega$ )) values of all the electrodes Si/CO-NC, Si/CO-NC1, Si/CO-NC2, Si-NC, and Co-NC.

| <b>Electrode</b> | <b><math>R_s</math> (<math>\Omega</math>)</b> | <b><math>R_{CT}</math> (<math>\Omega</math>)</b> |
|------------------|-----------------------------------------------|--------------------------------------------------|
| Si/CO-NC         | 1.80                                          | 4.40                                             |
| Si/CO-NC1        | 1.40                                          | 3.50                                             |
| Si/CO-NC2        | 1.64                                          | 3.66                                             |
| Si-NC            | 1.45                                          | 4.98                                             |
| Co-NC            | 1.35                                          | 4.55                                             |

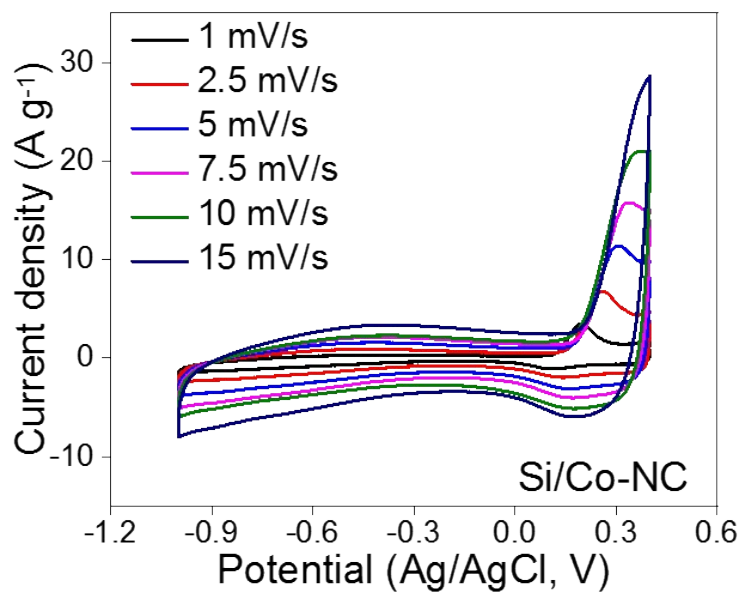

**Figure S3:** CV profiles of Si/Co-NC integrated electrode at various scan rates from 1 to 15 mV/s.

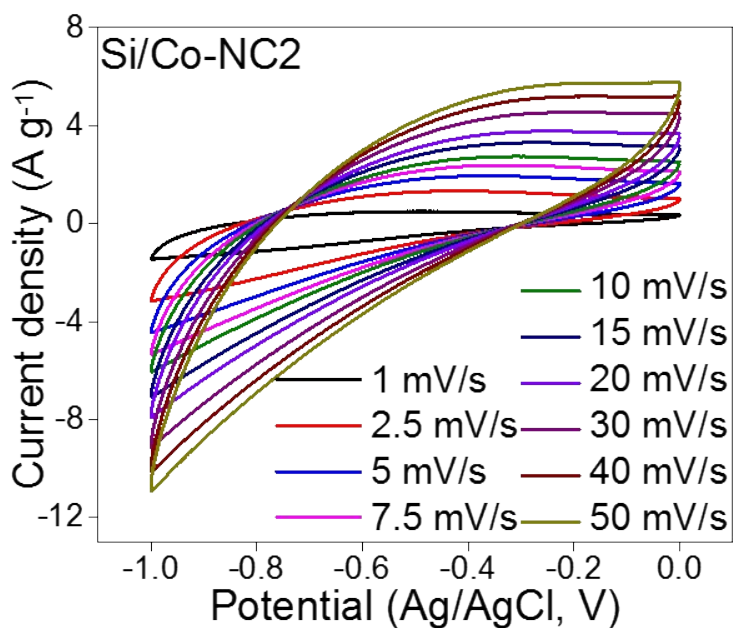

**Figure S4:** CV profiles of Si/Co-NC2 integrated electrode at various scan rates from 1 to 50 mV/s.

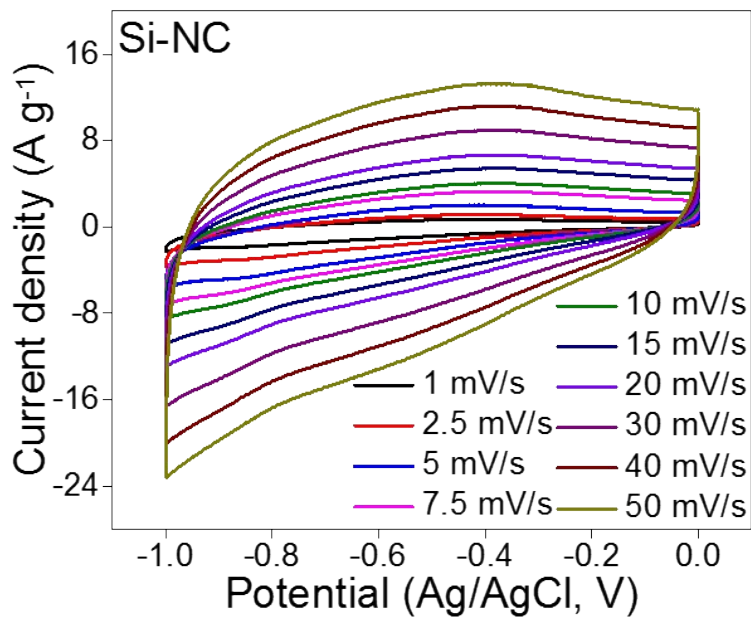

**Figure S5:** CV profiles of Si-NC electrode at various scan rates from 1 to 50  $\text{mV/s}$ .

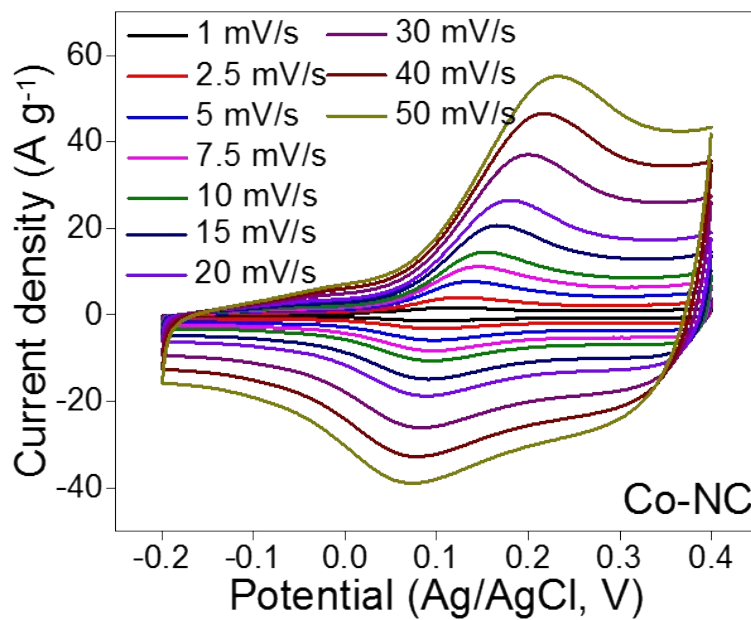

**Figure S6:** CV profiles of Co-NC electrode at various scan rates from 1 to 50  $\text{mV/s}$ .

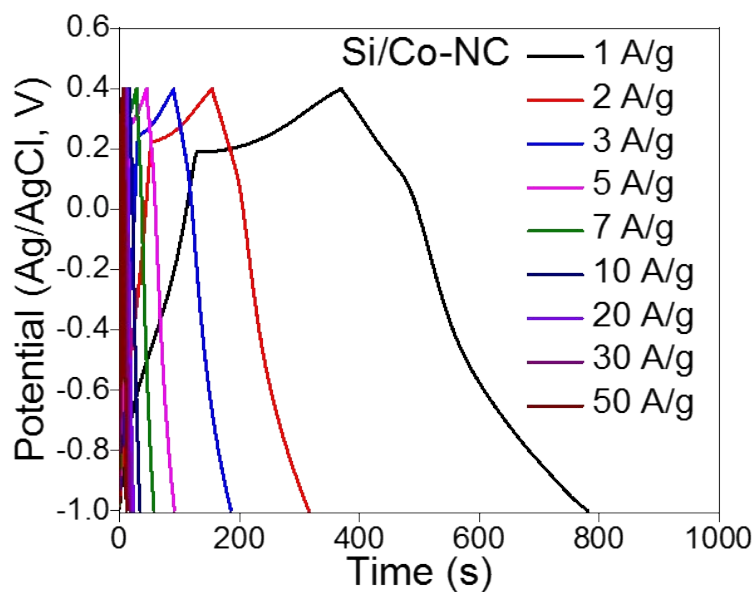

**Figure S7:** GCD profiles of Si/Co-NC integrated electrode at various current densities from 1 to 50 A/g.

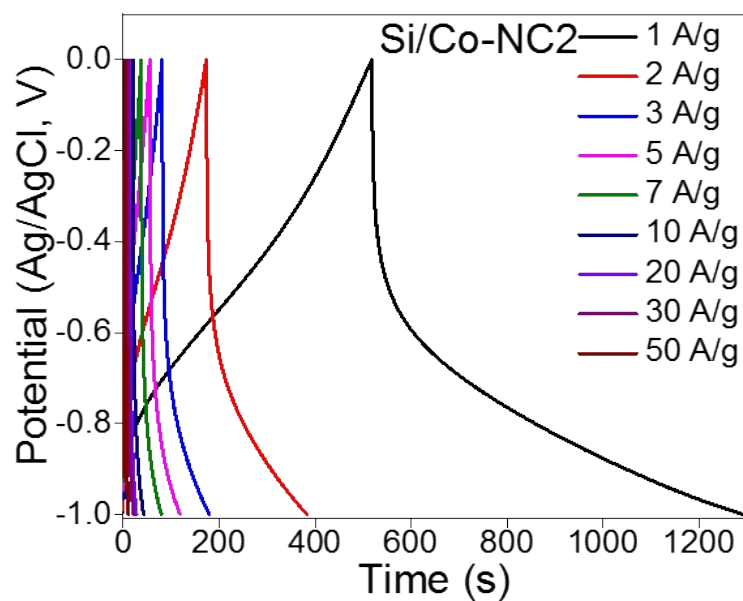

**Figure S8:** GCD profiles of Si/Co-NC2 integrated electrode at various current densities from 1 to 50 A/g.

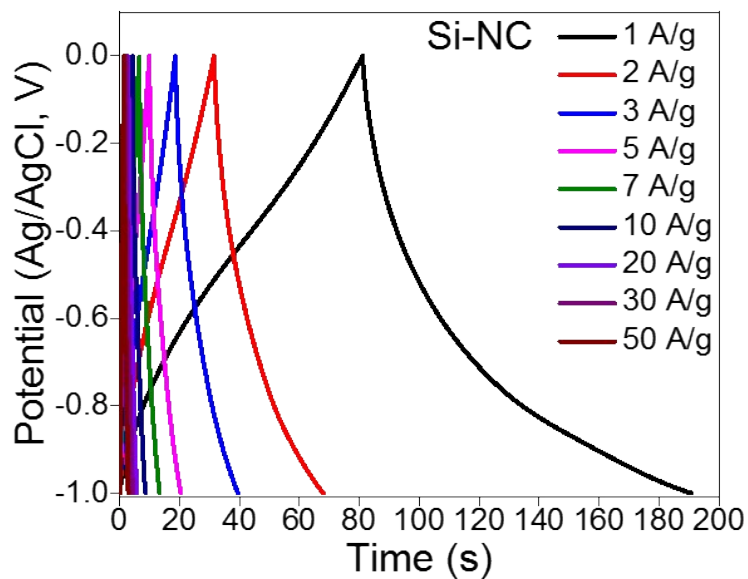

**Figure S9:** GCD profiles of Si-NC electrode at various current densities from 1 to 50 A/g.

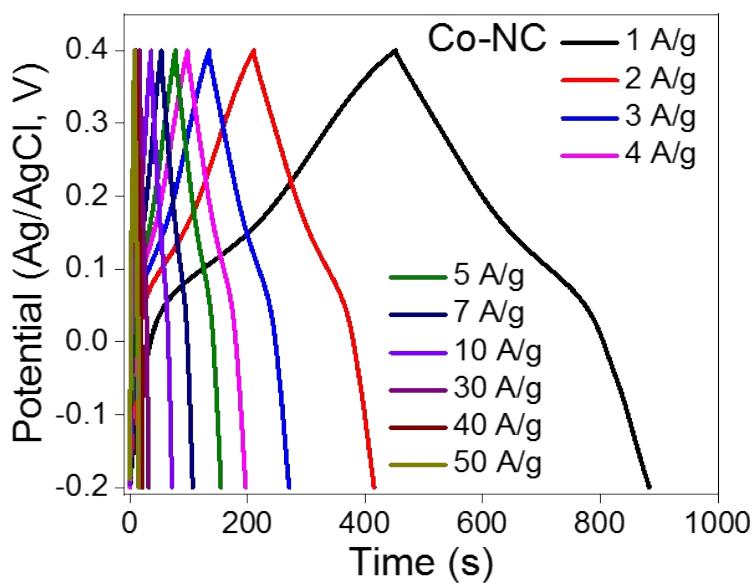

**Figure S10:** GCD profiles of Co-NC integrated electrode at various current densities from 1 to 50 A/g.

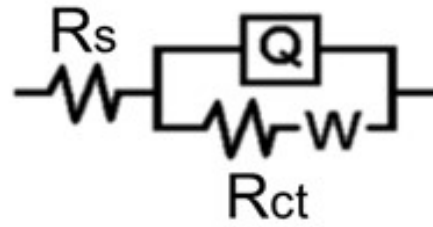

**Figure S11:** The equivalent circuit diagram for the analysis of EIS plot.

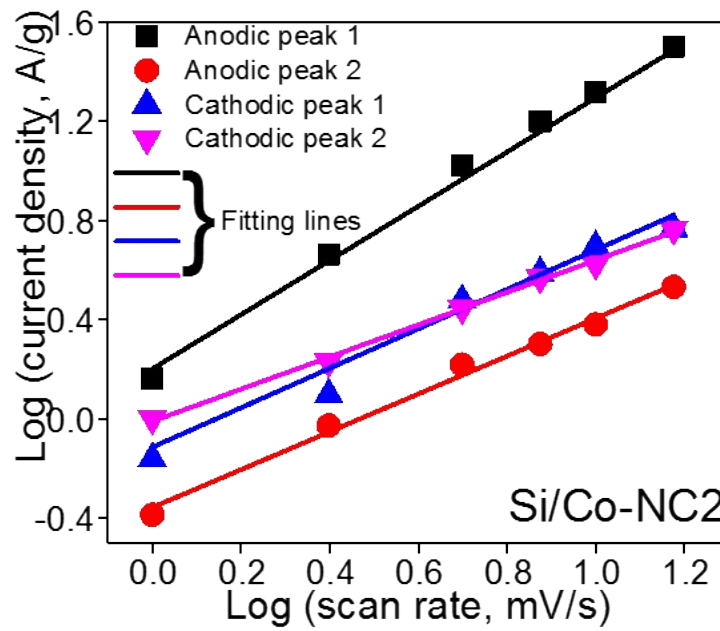

**Figure S12:**  $b$ -values calculated from  $\log(i)$  versus  $\log(v)$  of Si/Co-NC2.

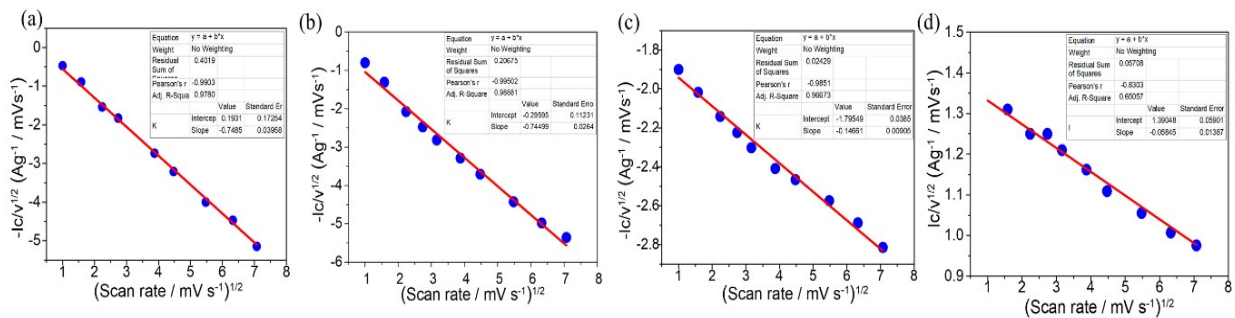



**Figure S13:** The calculation of  $k_1$  and  $k_2$ -values in KOH aqueous electrolyte at various scan rates for (a) Si/Co-NC, (b) Si/Co-NC1, (c) Si/Co-NC2, and (d) Co-NC

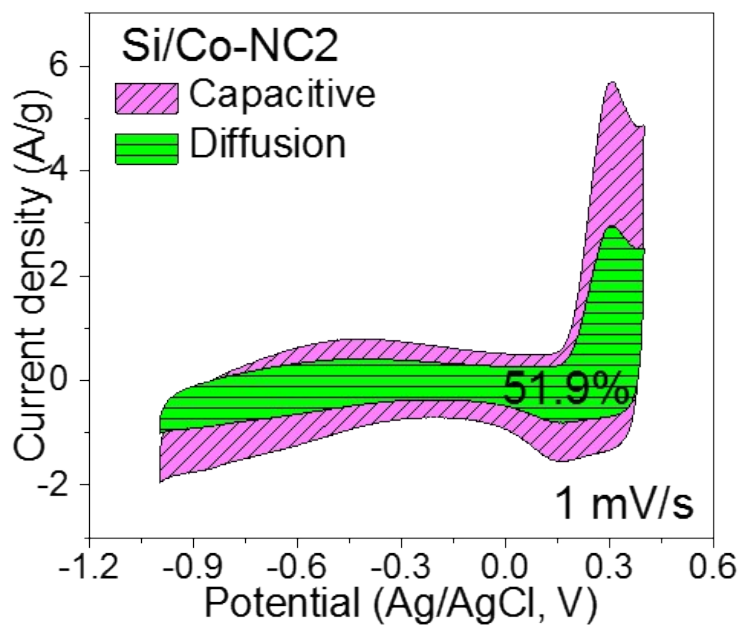

**Figure S14:** Percentage capacitive-controlled contribution in total charge storage process of Si/Co-NC2.

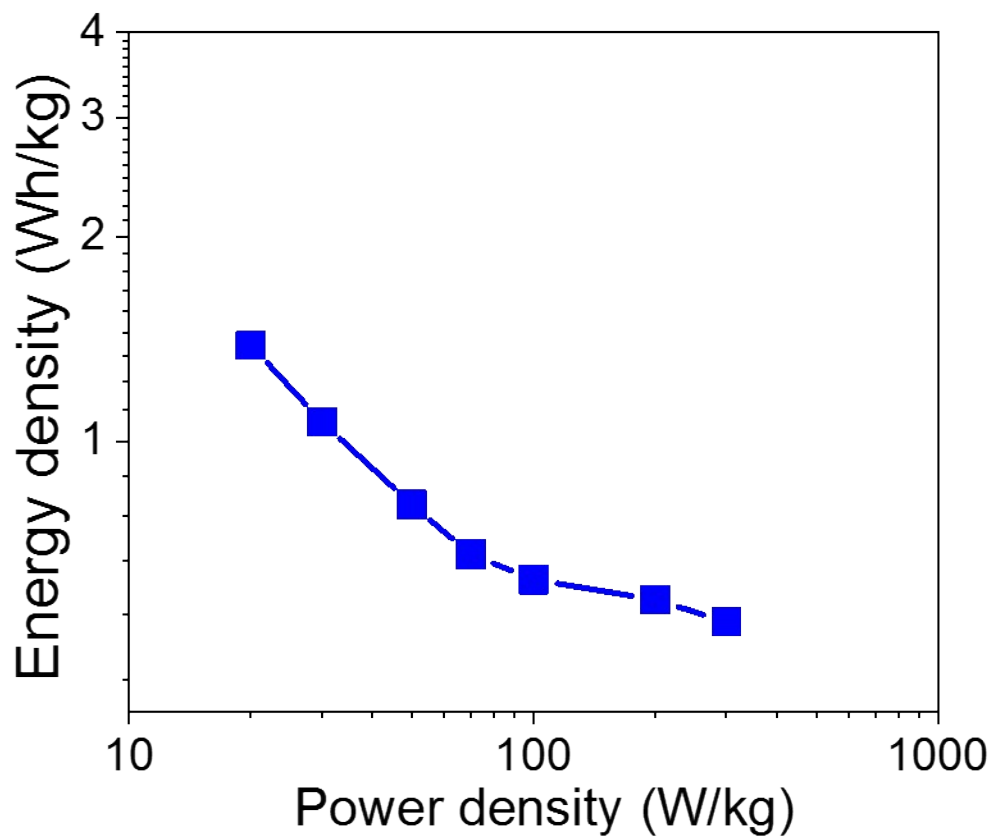

**Figure S15:** Ragone plot of Si/Co-NC1||Si/Co-NC1-SPC using the SC mass (containing electrodes/separator/electrolyte).

**Table S3:** A comparison table of electrochemical performances of bimetallic oxides and integrated system based three and two electrode supercapacitors.

| Material three-electrode                        | Electrolyte                     | Capacitance in 3-electrode (F/g) at 1A/g | Rate/Cycles  | Material two-electrode                                          | Capacitance in 2 electrode (F/g) at 2 A/g | Rate/Cycles  | E (Wh/kg) / P (W/kg) | Ref          |
|-------------------------------------------------|---------------------------------|------------------------------------------|--------------|-----------------------------------------------------------------|-------------------------------------------|--------------|----------------------|--------------|
| Si/Co-NC1                                       | KOH                             | 850                                      | 97%/10,000   | Si/Co-NC1//Si/Co-NC1                                            | 276                                       | 96.8%/50,000 | 125/3500             | This work    |
| ZFO-ACFs                                        | KOH                             | 192                                      | 92.7%/20,000 | ZFO-ACFs//ZFO-ACFs                                              | 45                                        | -            | 27.6/523.6           | <sup>1</sup> |
| CoFe <sub>2</sub> O <sub>4</sub> /graphene/PANI | KOH                             | 767.7                                    | ---          |                                                                 | 392.3                                     | 96%/5000     | 79.7/178.2           | <sup>2</sup> |
| NiCo <sub>2</sub> O <sub>4</sub> -CNT@DNA       | KOH                             | 760                                      | 96.2/5000    | NiCo <sub>2</sub> O <sub>4</sub> -CNT@DNA//AC                   | 223.7                                     | 90.3%/5000   | 69.7/373.9           | <sup>3</sup> |
| NiCo <sub>2</sub> O <sub>4</sub> -UNSA          | KOH                             | 7.29                                     | 88.5%/5000   | NiCo <sub>2</sub> O <sub>4</sub> -UNSA@NiMoO <sub>4</sub> //AC  | 148                                       | -            | 52.6/332.4           | <sup>4</sup> |
| NiNTAs@Fe <sub>2</sub> O <sub>3</sub>           | Na <sub>2</sub> SO <sub>4</sub> | 418.7                                    | 93.3%/5000   | NiNTAs@Fe <sub>2</sub> O <sub>3</sub> //NiNTAs@MnO <sub>2</sub> | 95.9                                      | 92.3%/5000   | 34.1/3197.7          | <sup>5</sup> |
| ZnCo <sub>2</sub> O <sub>4</sub>                | KOH                             | 776.2                                    | 84.3%/5000   | ZnCo <sub>2</sub> O <sub>4</sub> //RGO                          | 66                                        | -            | 84.84/400            | <sup>6</sup> |
| NiCo <sub>2</sub> O <sub>4</sub>                | KOH                             | 200                                      | 62.5%/5000   | NiCo <sub>2</sub> O <sub>4</sub> //GO                           | 61                                        | -            | 38.53/299.3          | <sup>7</sup> |

## References:

1. S. Yang, Z. Han, F. Zheng, J. Sun, Z. Qiao, X. Yang, L. Li, C. Li, X. Song and B. Cao, *Carbon*, 2018, **134**, 15-21.
2. P. Xiong, H. Huang and X. Wang, *Journal of Power Sources*, 2014, **245**, 937-946.
3. Y. Xue, T. Chen, S. Song, P. Kim and J. Bae, *Nano Energy*, 2019, **56**, 751-758.
4. P. Zhang, J. Zhou, W. Chen, Y. Zhao, X. Mu, Z. Zhang, X. Pan and E. Xie, *Chemical Engineering Journal*, 2017, **307**, 687-695.
5. Y. Li, J. Xu, T. Feng, Q. Yao, J. Xie and H. J. A. F. M. Xia, *Advanced Functional Materials*, 2017, **27**, 1606728.
6. L. Xu, Y. Zhao, J. Lian, Y. Xu, J. Bao, J. Qiu, L. Xu, H. Xu, M. Hua and H. Li, *Energy*, 2017, **123**, 296-304.
7. Y. V. Kaneti, R. R. Salunkhe, N. L. Wulan Septiani, C. Young, X. Jiang, Y.-B. He, Y.-M. Kang, Y. Sugahara and Y. Yamauchi, *Journal of Materials Chemistry A*, 2018, **6**, 5971-5983.
